# Supplementary material
Source: ML conference proceedings conference paper supplement (https://aclanthology.org/2026.semeval-1.446)
Supplement: SupplementaryMaterial [file a_cropped.pdf › a_cropped.pdf]

**Goal:** Identify the most direct cause of an event from noisy, multi-document evidence.

**Abductive Inference:**  $K$  (Background Knowledge)  $\cup \{h\} \rightarrow O$  (Target Event)

where simplest and most direct explanation 

### Noisy Document Collection ( $D$ )

- Topics (Multiple types).
- ~20 Documents.
- ~28k tokens.

 Distributed & Noisy Evidence

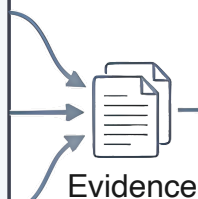

### Evidence-Grounded Multiple Choice

Question

+

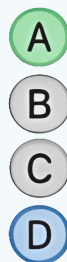

Predict based  
on evidence

Output: "A,D"

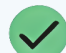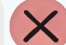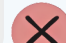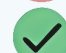

### Overall Key Challenges

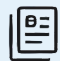

Evidence-rich (noisy multi-doc).

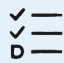

Supports multiple correct answers.

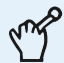

Focus on direct triggers, not background factors.

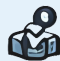

Realistic scenario.
