# Supplementary material
Source: ML conference proceedings conference paper supplement (https://aclanthology.org/2026.semeval-1.446)
Supplement: SupplementaryMaterial [file pp_cropped.pdf › pp_cropped.pdf]

Document  
Retrieval

Event Extraction  
& Timeline

Multi-model  
Scoring

Filtering &  
Verification

Question  
Construction

- Relevant Docs
- Distractor Docs

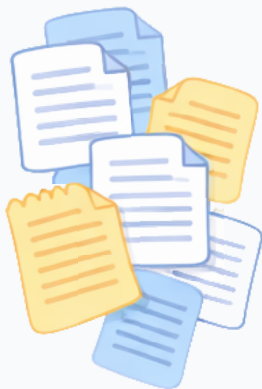

Sentence-level Events

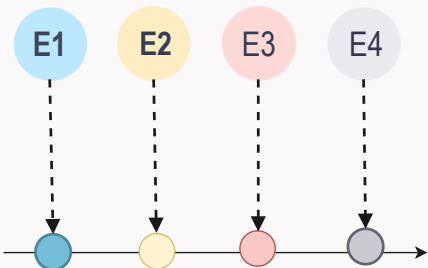

Timeline Construction

Extract → Merge →  
Disambiguate

Candidate Pairs  
(Cause → Target)

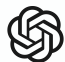

GPT-4.1

S1

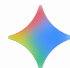

Gemini-2.0

S2

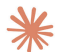

Claude-3.7

S3

Compute Variance

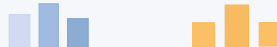

Variance

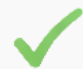

Keep

Variance

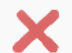

Discard

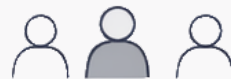

Annotation

Majority → Keep

Disagree → Remove

Target Event

4 Options

- A. ...
- B. ...
- C. ...
- D. ...

Multi-select answers

Output: "B,C"
